# Supplementary material for: An Integrated Similarity Analysis of Anatomical and Physical Wood Properties of Tropical Species from India, Mozambique, and East Timor
Source: MDPI journal article supplement (doi:10.3390/f13101675), 2022-10-12
Supplement: s1 [file s1]

## Supplementary materials

**Table S1.** Mean values for each of the studied anatomical or physical wood variables studied and scientific names and codes of the corresponding species (as listed in Table 1). For code characters and abbreviations, see Table 2.

| Code | V1  | V4    | V5  | V6  | V7  | R1 | R3 | R5   | R7  | R8  | F1  | F2   | F4   | F5   | F6  | F7   | FIS1 |
|------|-----|-------|-----|-----|-----|----|----|------|-----|-----|-----|------|------|------|-----|------|------|
| I1   | 7   | 4.65  | 5.9 | 152 | 127 | 8  |    | 184  | 3   | 35  | 3.9 | 941  | 15   | 2.4  | 62  |      | 0.93 |
| I2   | 2   | 9.60  | 7.1 | 166 | 136 | 14 |    | 112  | 2   | 15  | 4   | 841  | 18   | 2    | 47  |      | 0.72 |
| I3   | 3   | 6.25  | 7.6 | 179 | 167 | 5  |    | 134  | 2   | 16  | 3   | 926  | 22   | 3.5  | 41  |      | 0.85 |
| I4   | 3   | 6.95  | 7.1 | 185 | 176 | 5  |    | 366  | 3   | 33  | 3.9 |      |      |      |     |      | 0.62 |
| I5   | 1   | 10.50 | 7.1 | 388 | 264 | 4  |    |      | 4   |     | 5.2 | 2416 | 29   | 3.4  | 83  |      | 0.37 |
| I6   | 4   | 9.00  | 7.1 | 333 | 141 | 10 |    | 341  | 4   | 42  | 6.4 | 1894 | 22   | 2.3  | 85  |      | 0.68 |
| I7   | 4   | 5.50  | 5.8 | 150 | 152 | 12 |    | 101  | 2   | 24  | 3.7 | 859  | 21   | 2.4  | 40  |      | 0.81 |
| I8   | 9   | 7.15  | 6.0 | 419 | 116 | 12 |    | 214  | 3   | 36  | 6.1 | 1490 | 22   | 2.7  | 67  |      | 0.67 |
| I9   | 2   | 8.75  | 6.9 | 298 | 184 | 5  |    | 335  | 4   | 49  |     | 1235 | 24   | 3.7  | 51  |      | 0.50 |
| I10  | 4   | 6.55  | 6.4 | 160 | 200 | 15 |    | 165  | 1   | 13  | 4.1 | 1093 | 27   | 3.7  | 40  |      | 0.53 |
| I11  | 3   | 10.50 | 6.5 | 218 | 195 | 9  |    | 258  | 2   | 41  | 3.6 | 821  | 21   | 2.4  | 39  |      | 0.58 |
| I12  | 12  | 1.40  | 4.4 | 285 | 86  | 7  |    |      | 5   |     | 3.7 | 869  | 17   | 2.2  | 50  |      | 0.62 |
| I13  | 6   | 5.25  | 6.3 | 244 | 158 | 6  |    | 301  | 3   | 41  | 4   | 1242 | 25   | 4    | 49  |      | 0.66 |
| I14  | 2   | 7.30  | 7.1 | 326 | 178 | 10 |    | 200  | 2   | 21  | 3.7 | 1240 | 20   | 3.4  | 61  |      | 0.55 |
| I15  | 7   | 6.87  | 6.7 | 262 | 148 | 10 |    | 174  | 1   | 21  | 4.5 | 1554 | 20   | 2.5  | 73  |      | 0.63 |
| I16  | 3   | 8.65  | 6.4 | 182 | 180 | 10 |    | 103  | 1   | 19  | 3.7 | 1296 | 20   | 3    | 65  |      | 0.76 |
| I17  | 9   | 6.40  | 7.0 | 325 | 147 | 12 |    | 236  | 2   | 24  | 4.5 | 1293 | 18   | 2.3  | 72  |      | 0.76 |
| M1   | 12  |       | 3.5 | 625 | 105 | 16 | 10 | 415  | 2   | 30  | 6.7 | 1640 | 25   | 4.4  | 66  | 12   | 0.90 |
| M2   | 8   | 8.75  | 5.2 | 205 | 110 | 8  | 28 | 190  | 3   | 28  | 6   | 1015 | 15   | 2.5  | 70  | 12.5 | 0.87 |
| M3   | 2   | 7.60  | 5.8 | 290 | 180 | 5  | 23 | 240  | 3   | 51  | 3.6 | 1415 | 24   | 4.7  | 64  | 15   | 0.81 |
| M4   | 2   | 7.55  | 7.0 | 300 | 205 | 5  | 38 | 235  | 3   | 27  | 3.3 | 1260 | 19   | 3.2  | 67  | 14   | 0.63 |
| M5   | 2   | 8.75  | 4.3 | 175 | 170 | 6  | 26 | 145  | 4   | 36  | 2.9 | 940  | 26   | 5.1  | 38  | 10   | 0.68 |
| M6   | 3   | 7.25  | 6.9 | 260 | 155 | 11 | 16 | 195  | 2   | 30  | 5.5 | 1275 | 19   | 3.9  | 73  | 20   | 1.07 |
| M7   | 193 | 4.00  | 3.7 | 335 | 45  | 8  | 8  | 180  | 1   | 13  | 5.9 | 735  | 20   | 3.1  | 35  | 8    | 0.91 |
| M8   | 3   | 11.70 | 5.0 | 375 | 210 | 8  | 20 | 347  | 2   | 52  | 4.7 | 1887 | 27   | 4.8  | 72  | 18   | 0.44 |
| M9   | 5   | 9.10  | 6.0 | 310 | 140 | 6  | 30 | 240  | 3   | 33  | 6.2 | 1265 | 16   | 3    | 84  | 18   | 0.97 |
| M10  | 3   | 4.35  | 4.5 | 280 | 130 | 5  |    | 335  | 4   | 40  | 3.6 | 1430 | 21   | 4.2  | 72  | 19   | 0.69 |
| M11  | 12  | 8.10  | 3.5 | 260 | 125 | 7  |    | 405  | 4   | 45  | 3.1 | 1270 | 15   | 2.3  | 85  | 15   | 0.72 |
| M12  | 4   | 9.90  | 4.5 | 270 | 215 | 8  | 52 | 295  | 4   | 47  | 2.6 | 1440 | 20   | 4.1  | 77  | 21   | 0.66 |
| M13  | 8   | 5.15  | 4.0 | 195 | 80  | 11 | 13 | 155  | 2   | 25  | 3.9 | 835  | 12   | 1.8  | 71  | 18   | 1.29 |
| M14  | 2   |       | 3.8 | 215 | 145 | 20 | 12 | 240  | 2   | 25  | 5.3 | 1180 | 20   | 3.1  | 63  | 14   | 1.25 |
| M15  | 2   | 8.40  | 5.2 | 205 | 170 | 9  | 11 | 150  | 2   | 31  | 4.1 | 925  | 19   | 4    | 52  | 14   | 0.74 |
| M16  | 5   | 8.25  | 4.5 | 150 | 115 | 13 | 10 | 155  | 2   | 17  | 5.7 | 700  | 18   | 3.5  | 40  | 8    | 1.25 |
| M17  | 5   | 8.80  | 6.2 | 245 | 105 | 10 | 27 | 190  | 2   | 18  | 4   | 1175 | 16   | 2.3  | 75  | 14   | 1.16 |
| M18  | 4   | 4.15  | 4.4 | 320 | 105 | 18 | 11 | 280  | 3   | 30  | 3.9 | 1010 | 17   | 2.9  | 62  | 14   | 0.76 |
| M19  | 5   | 9.25  | 6.4 | 325 | 160 | 7  | 28 | 220  | 2   | 25  | 6.1 | 1110 | 18   | 3.5  | 65  | 14   | 1.09 |
| M20  | 3   | 8.50  | 6.6 | 285 | 190 | 15 | 17 | 200  | 2   | 21  | 5.4 | 1270 | 14.5 | 3.3  | 91  | 21   | 0.98 |
| M21  | 4   | 4.00  | 3.1 | 280 | 135 | 7  | 28 | 310  | 4   | 50  | 3   | 1485 | 21   | 3.9  | 72  | 14   | 0.60 |
| M22  | 4   | 4.50  | 5.5 | 425 | 205 | 5  |    | 515  | 5   | 92  | 4.4 | 1630 | 22   | 4.9  | 79  | 20   | 0.67 |
| M23  | 2   | 8.25  | 5.0 | 215 | 205 | 8  | 30 | 185  | 3   | 35  | 6.9 | 1520 | 19   | 3.5  | 79  | 18   | 0.87 |
| M24  | 4   | 10.20 | 3.6 | 225 | 145 | 9  | 35 | 240  | 3   | 35  | 3.3 | 1040 | 13   | 2.5  | 83  | 19   | 0.77 |
| M25  | 1   | 9.50  | 7.0 | 240 | 170 | 9  | 20 | 200  | 3   | 45  | 7.2 | 1350 | 24   | 4    | 60  | 12.5 | 0.70 |
| M26  | 3   | 7.95  | 4.0 | 210 | 145 | 19 | 9  | 170  | 2   | 23  | 4.3 | 1165 | 16   | 3.2  | 77  | 13   | 0.74 |
| M27  | 3   | 5.00  | 5.0 | 220 | 150 | 6  | 24 | 205  | 2   | 25  | 3   | 1400 | 19   | 4.2  | 75  | 24   | 0.50 |
| M28  | 15  | 8.75  | 3.1 | 405 | 83  | 10 | 10 | 165  | 2   | 16  | 3.7 | 1270 | 15   | 2.5  | 92  | 21   | 0.80 |
| M29  | 3   | 8.90  | 4.8 | 200 | 200 | 13 | 6  | 125  | 2   | 19  | 2.8 | 1135 | 26   | 5.5  | 46  | 12.5 | 0.58 |
| M30  | 1   | 15.85 | 4.5 | 560 | 285 | 9  | 8  | 295  | 1   | 25  | 2.7 | 1255 | 46   | 11.0 | 29  | 7    | 0.23 |
| M31  | 19  | 7.85  | 3.7 | 365 | 80  | 19 | 11 | 210  | 2   | 14  | 2.9 | 810  | 15   | 2.3  | 55  | 11   | 1.00 |
| M32  | 4   | 8.45  | 4.1 | 325 | 230 | 3  |    | 1500 | >10 | 205 | 6.6 | 2150 | 21   | 3.3  | 107 | 20   | 0.58 |

| Code | V1 | V4    | V5   | V6  | V7  | R1 | R3 | R5   | R7 | R8  | F1  | F2   | F4 | F5  | F6  | F7 | FIS1 |
|------|----|-------|------|-----|-----|----|----|------|----|-----|-----|------|----|-----|-----|----|------|
| M33  | 7  | 7.60  | 4.0  | 190 | 100 | 9  | 17 | 155  | 2  | 34  | 6.7 | 1045 | 16 | 2.5 | 70  | 15 | 1.02 |
| T1   | 2  | 6.00  | 9.6  | 248 | 222 | 5  | 15 | 181  | 2  | 215 | 4.6 | 990  | 27 | 4.7 | 38  | 8  | 0.51 |
| T2   | 1  | 11.00 | 6.2  | 850 | 208 | 8  |    |      | 2  |     | 3.1 | 1704 | 33 | 5   | 53  | 11 | 0.46 |
| T3   | 4  | 4.00  | 6.2  | 542 | 150 | 6  | 10 | 323  | 2  | 34  | 2.7 | 1393 | 33 | 4.3 | 42  | 8  | 0.40 |
| T4   | 8  | 7.00  | 5.4  | 445 | 102 | 14 |    |      | 2  |     | 4.6 | 2184 | 31 | 4   | 70  | 12 | 0.55 |
| T5   | 7  | 11.00 | 6.1  |     | 124 | 10 |    |      | 3  |     | 5.7 | 2252 | 38 | 5   | 62  | 13 | 0.66 |
| T6   | 3  |       | 5.9  | 297 | 150 | 12 | 5  | 114  | 2  | 19  | 3.5 | 967  | 19 | 2   | 52  | 10 | 0.70 |
| T7   | 7  | 6.00  | 4.4  | 285 | 142 | 5  | 9  | 253  | 2  | 22  | 2.5 | 1005 | 24 | 4   | 46  | 15 | 0.46 |
| T8   | 11 |       | 5.6  | 301 | 133 | 12 | 7  | 164  | 2  | 15  | 3.5 | 1167 | 17 | 3   | 68  | 17 | 0.67 |
| T9   | 13 | 6.00  | 4.6  | 353 | 89  | 12 | 13 | 248  | 2  | 14  | 4.8 | 1170 | 14 | 2   | 85  | 14 | 1.01 |
| T10  | 4  | 5.00  | 5.9  | 289 | 173 | 5  | 8  | 249  | 3  | 41  | 2.8 | 1132 | 27 | 4   | 43  | 9  | 0.46 |
| T11  | 16 |       | 4.7  | 304 | 75  | 17 |    |      | 2  |     | 3.8 | 1040 | 18 | 2   | 56  | 7  | 0.86 |
| T12  | 7  | 12.00 | 5.3  | 456 | 78  | 15 |    |      | 3  |     | 2.4 | 1194 | 30 | 4   | 41  | 8  | 0.51 |
| T13  | 3  |       | 6.1  | 260 | 164 | 7  | 11 | 272  | 1  | 28  | 2.4 | 993  | 33 | 7   | 32  | 11 | 0.42 |
| T14  | 23 | 5.00  | 5.7  | 264 | 78  | 12 | 7  | 132  | 2  | 13  | 3.1 | 913  | 15 | 2   | 62  | 11 | 0.73 |
| T15  | 6  | 5.00  | 5.7  | 252 | 135 | 6  | 11 | 284  |    | 38  | 3.5 | 1343 | 25 | 3.9 | 58  | 12 | 0.63 |
| T16  | 16 | 4.00  | 5.0  | 578 | 78  | 13 |    |      | 3  |     | 6   | 1350 | 16 | 3   | 91  | 21 | 0.86 |
| T17  | 3  | 6.00  | 9.8  | 287 | 201 | 7  |    | 246  | 2  | 23  | 3.9 | 1474 | 20 | 3   | 77  | 14 | 0.83 |
| T18  | 6  |       | 5.0  | 524 | 152 | 18 |    |      | 2  |     | 3   | 1426 | 35 | 5   | 42  | 6  |      |
| T19  | 10 |       | 5.1  | 255 | 108 | 17 | 6  | 155  | 2  | 15  | 3.9 | 888  | 21 | 3   | 43  | 8  |      |
| T20  | 4  | 4.00  | 7.3  | 372 | 166 | 14 | 11 | 230  | 2  | 24  | 4.2 | 1012 | 17 | 2.5 | 60  | 12 | 0.84 |
| T21  | 3  | 6.00  | 7.7  | 198 | 164 | 11 | 5  | 133  | 2  | 20  | 3.4 | 1088 | 21 | 3.6 | 53  | 12 | 0.70 |
| T22  | 4  | 4.00  | 5.0  | 320 | 103 | 8  |    |      | 2  |     | 2.4 | 1243 | 26 | 5   | 51  | 15 | 0.44 |
| T23  | 4  | 6.00  | 5.7  | 363 | 108 | 10 |    |      | 3  |     | 2.7 | 1249 | 29 | 5   | 43  | 8  | 0.50 |
| T24  | 63 | 5.00  | 4.8  | 230 | 59  | 8  | 7  | 116  | 2  | 18  | 3.9 | 898  | 18 | 4.3 | 60  | 15 | 0.76 |
| T25  | 6  | 6.00  | 6.2  | 540 | 124 | 13 |    |      | 2  |     | 5.5 | 1949 | 31 | 4.7 | 65  | 13 | 0.74 |
| T26  | 9  | 5.00  | 5.3  | 276 | 89  | 17 |    |      | 2  |     | 3.7 | 998  | 17 | 3   | 60  | 11 | 0.96 |
| T27  | 3  | 7.00  | 6.3  | 355 | 214 | 3  |    | 1042 | 7  | 161 | 5.4 | 1949 | 21 | 3.3 | 95  | 18 | 0.73 |
| T28  | 9  | 6.00  | 6.0  | 212 | 83  | 12 | 12 | 187  | 2  | 17  | 3.5 | 1023 | 14 | 2   | 73  | 12 | 1.37 |
| T29  | 6  | 7.00  | 6.5  | 250 | 150 | 4  |    |      | 3  |     | 3.6 | 1200 | 25 | 4   | 50  | 10 | 0.63 |
| T30  | 4  | 6.00  | 9.1  | 308 | 200 | 6  | 10 | 229  | 2  | 35  | 4.1 | 1216 | 21 | 1.9 | 58  | 11 | 0.75 |
| T31  | 7  | 4.00  | 6.1  | 215 | 110 | 6  | 8  | 157  | 3  | 26  | 4.5 | 1056 | 19 | 3   | 58  | 12 | 0.77 |
| T32  | 8  | 5.00  | 5.2  | 472 | 106 | 12 | 12 | 346  | 3  | 31  | 7   | 1576 | 24 | 2.9 | 70  | 9  | 0.69 |
| T33  | 14 | 9.00  | 6.3  | 217 | 110 | 8  | 9  | 183  | 2  | 25  | 4.6 | 1022 | 20 | 3   | 55  | 10 | 1.01 |
| N1   | 2  | 2.49  | 8.0  | 229 | 148 | 2  | 67 | 475  | 6  | 64  | 5.4 | 1131 | 21 | 3.0 | 54  |    |      |
| N2   | 2  | 4.49  | 10.7 | 376 | 170 | 6  | 13 | 260  | 2  | 43  | 5.2 | 1268 | 18 | 3.1 | 70  |    |      |
| N3   | 5  | 2.05  | 7.2  | 312 | 100 | 5  | 22 | 272  | 3  | 37  | 5.6 | 1272 | 23 | 3.5 | 55  |    |      |
| N4   | 2  | 1.49  | 11.9 | 243 | 102 | 6  | 15 | 303  | 4  | 65  | 4.6 | 974  | 22 | 2.6 | 44  |    |      |
| N5   | 5  | 1.16  | 4.7  | 238 | 54  | 6  | 25 | 309  | 4  | 50  | 4.8 | 1086 | 20 | 2.9 | 54  |    |      |
| N6   | 2  | 3.20  | 8.4  | 241 | 104 | 14 | 18 | 348  | 2  | 17  | 3.7 | 885  | 19 | 2.0 | 47  |    |      |
| N7   | 6  | 2.19  | 5.2  | 281 | 69  | 3  | 22 | 392  | 3  | 39  | 4.7 | 1211 | 16 | 1.9 | 39  |    |      |
| N8   | 4  | 3.15  | 6.1  | 318 | 110 | 12 | 11 | 226  | 2  | 25  | 4.4 | 1356 | 17 | 2.2 | 80  |    |      |
| N9   | 2  | 3.99  | 10.1 | 207 | 182 | 6  | 17 | 269  | 4  | 45  | 4.3 | 1252 | 16 | 2.3 | 78  |    |      |
| N10  | 11 | 1.47  | 13.0 | 194 | 69  | 23 | 11 | 112  | 1  | 17  | 5.8 | 1411 | 23 | 3.2 | 61  |    |      |
| N11  | 2  | 1.66  | 6.5  | 249 | 140 | 4  | 15 | 327  | 2  | 39  | 4.4 | 1362 | 16 | 1.6 | 85  |    |      |
| N12  | 12 | 3.31  | 3.3  | 360 | 48  | 7  | 14 | 300  | 2  | 30  | 4.5 | 1396 | 20 | 2.8 | 70  |    |      |
| N13  | 6  | 2.93  | 3.3  | 264 | 62  | 7  | 20 | 355  | 2  | 22  | 4.7 | 851  | 16 | 1.9 | 53  |    |      |
| N14  | 3  | 2.90  | 6.0  | 186 | 103 | 5  | 13 | 196  | 5  | 46  | 4.9 | 3780 | 26 | 4.3 | 145 |    |      |
| N15  | 5  | 1.98  | 15.6 | 238 | 87  | 15 | 14 | 189  | 2  | 26  | 5.1 | 911  | 18 | 1.7 | 51  |    |      |

| Code | FIS2 | FIS3  | FIS4 | FIS5  | FIS6 | FIS7 | FIS8 | FIS9 | FIS10 | FIS11 | FIS12 | C4    | C5    | C6    | C7 |
|------|------|-------|------|-------|------|------|------|------|-------|-------|-------|-------|-------|-------|----|
| I1   | 0.85 |       | 19.3 | 7.53  | 4.50 | 2.46 | 0.45 | 0.39 | 0.23  | 0.12  | 0.03  | 46.56 | 16.61 | 22.26 | 14 |
| I2   | 0.68 |       | 30.0 | 13.62 | 9.17 | 3.90 | 0.01 | 0.45 | 0.29  | 0.15  | 0.00  | 70.61 | 6.33  | 23.93 | 4  |
| I3   | 0.78 |       | 21.0 | 8.13  | 5.42 | 2.35 | 0.20 | 0.38 | 0.25  | 0.12  | 0.01  | 40.97 | 12.10 | 14.95 | 14 |
| I4   | 0.58 |       | 21.0 | 9.57  | 6.21 | 3.00 | 0.20 | 0.46 | 0.30  | 0.15  | 0.01  | 62.24 | 13.46 | 32.83 | 8  |
| I5   | 0.35 |       | 25.0 | 9.11  | 6.25 | 2.53 | 0.15 | 0.36 | 0.23  | 0.12  | 0.01  | 62.39 | 6.30  | 23.10 | 3  |
| I6   | 0.66 |       | 26.0 | 12.80 | 8.37 | 3.85 | 0.20 | 0.49 | 0.31  | 0.15  | 0.01  | 54.17 | 12.21 | 21.03 | 14 |
| I7   | 0.76 |       | 19.5 | 10.12 | 6.66 | 2.95 | 0.23 | 0.52 | 0.33  | 0.17  | 0.02  | 37.01 | 7.29  | 8.34  | 25 |
| I8   | 0.63 |       | 30.0 | 12.18 | 8.46 | 3.16 | 0.03 | 0.40 | 0.27  | 0.12  | 0.00  | 53.48 | 10.36 | 15.97 | 14 |
| I9   | 0.47 |       | 31.0 | 10.16 | 7.01 | 2.89 | 0.01 | 0.33 | 0.21  | 0.11  | 0.00  | 65.78 | 3.42  | 14.29 | 26 |
| I10  | 0.51 |       | 25.0 | 11.41 | 6.96 | 4.00 | 0.20 | 0.46 | 0.26  | 0.18  | 0.01  | 54.80 | 10.83 | 20.01 | 14 |
| I11  | 0.55 |       | 27.0 | 9.59  | 5.62 | 3.47 | 0.03 | 0.36 | 0.19  | 0.15  | 0.00  | 60.52 | 6.47  | 19.69 | 26 |
| I12  | 0.59 |       | 26.0 | 10.99 | 6.92 | 3.57 | 0.20 | 0.43 | 0.27  | 0.15  | 0.01  | 72.95 | 5.64  | 28.08 | 5  |
| I13  | 0.62 |       | 20.0 | 9.82  | 6.38 | 2.94 | 0.26 | 0.49 | 0.31  | 0.16  | 0.01  | 46.62 | 8.76  | 20.01 | 8  |
| I14  | 0.51 |       | 24.0 | 8.95  | 5.00 | 3.24 | 0.65 | 0.37 | 0.19  | 0.14  | 0.04  | 69.84 | 7.04  | 25.77 | 5  |
| I15  | 0.59 |       | 29.0 | 11.81 | 7.65 | 3.58 | 0.27 | 0.41 | 0.26  | 0.14  | 0.00  | 61.64 | 7.62  | 28.76 | 14 |
| I16  | 0.72 |       | 28.0 | 14.33 | 8.36 | 5.17 | 0.30 | 0.51 | 0.29  | 0.20  | 0.01  | 54.85 | 11.91 | 23.54 | 14 |
| I17  | 0.73 |       | 27.0 | 14.29 | 8.89 | 4.66 |      | 0.52 | 0.30  | 0.19  | 0.00  | 42.34 | 12.87 | 18.52 | 21 |
| M1   | 0.86 | 12.10 | 10.8 | 7.70  | 4.60 | 2.70 | 0.20 | 0.63 | 0.38  | 0.22  | 0.02  | 60.80 | 10.21 | 22.45 | 18 |
| M2   | 0.81 | 13.90 | 12.2 | 7.40  | 4.60 | 2.50 | 0.30 | 0.53 | 0.33  | 0.18  | 0.02  | 44.35 | 7.94  | 18.10 | 16 |
| M3   | 0.75 | 14.10 | 12.3 | 5.60  | 3.00 | 2.20 | 0.20 | 0.40 | 0.21  | 0.16  | 0.01  | 55.85 | 15.61 | 25.13 | 14 |
| M4   | 0.60 | 10.90 | 9.8  | 5.00  | 3.60 | 1.20 | 0.10 | 0.46 | 0.33  | 0.13  | 0.01  | 70.65 | 6.71  | 32.46 | 8  |
| M5   | 0.63 | 13.10 | 11.6 | 4.20  | 2.30 | 1.60 | 0.30 | 0.33 | 0.18  | 0.12  | 0.02  | 42.89 | 10.49 | 17.59 | 14 |
| M6   | 1.01 | 13.30 | 11.8 | 7.00  | 3.90 | 2.70 | 0.20 | 0.53 | 0.30  | 0.20  | 0.02  | 41.38 | 14.40 | 15.21 | 21 |
| M7   | 0.88 | 10.20 | 9.3  | 6.50  | 3.50 | 2.60 | 0.30 | 0.63 | 0.35  | 0.25  | 0.03  | 57.51 | 10.92 | 21.66 | 14 |
| M8   | 0.41 | 13.90 | 12.2 | 6.60  | 3.90 | 2.30 | 0.40 | 0.47 | 0.28  | 0.17  | 0.03  | 51.05 | 14.93 | 22.82 | 20 |
| M9   | 0.92 | 12.00 | 10.7 | 5.80  | 3.10 | 2.20 | 0.30 | 0.48 | 0.27  | 0.18  | 0.02  | 42.93 | 12.19 | 15.57 | 21 |
| M10  | 0.65 | 12.00 | 10.7 | 6.30  | 3.90 | 2.00 | 0.30 | 0.52 | 0.33  | 0.17  | 0.02  | 75.63 | 3.93  | 22.66 | 8  |
| M11  | 0.69 | 12.40 | 11.0 | 6.70  | 4.40 | 2.10 | 0.10 | 0.54 | 0.36  | 0.17  | 0.01  | 73.80 | 5.91  | 23.30 | 13 |
| M12  | 0.62 | 13.60 | 12.1 | 6.60  | 3.80 | 2.50 | 0.30 | 0.48 | 0.28  | 0.18  | 0.02  | 48.56 | 10.85 | 22.39 | 16 |
| M13  | 1.23 | 11.30 | 10.1 | 5.30  | 3.00 | 2.00 | 0.30 | 0.47 | 0.26  | 0.18  | 0.02  | 37.66 | 11.73 | 12.92 | 21 |
| M14  | 1.20 | 11.70 | 10.5 | 6.90  | 5.00 | 1.60 | 0.10 | 0.59 | 0.43  | 0.14  | 0.01  | 55.94 | 10.55 | 23.57 | 14 |
| M15  | 0.69 | 10.10 | 9.2  | 3.50  | 1.60 | 1.40 | 0.30 | 0.34 | 0.16  | 0.13  | 0.03  | 64.12 | 9.49  | 23.53 | 14 |
| M16  | 1.18 | 13.00 | 11.5 | 6.10  | 4.10 | 1.90 | 0.10 | 0.47 | 0.32  | 0.15  | 0.01  | 25.91 | 1.86  | 0.97  | 27 |
| M17  | 1.11 | 12.50 | 11.1 | 7.70  | 4.60 | 2.90 |      | 0.61 | 0.37  | 0.23  |       | 34.29 | 9.98  | 10.95 | 21 |
| M18  | 0.72 | 11.70 | 10.5 | 5.90  | 3.40 | 2.20 | 0.30 | 0.51 | 0.29  | 0.19  | 0.02  | 61.53 | 7.93  | 14.80 | 1  |
| M19  | 1.01 | 13.60 | 12.0 | 6.20  | 3.00 | 2.70 | 0.30 | 0.45 | 0.22  | 0.20  | 0.02  | 40.72 | 14.57 | 16.15 | 19 |
| M20  | 0.91 | 14.60 | 12.8 | 7.20  | 3.80 | 2.80 | 0.30 | 0.49 | 0.26  | 0.19  | 0.02  | 44.60 | 10.54 | 15.95 | 14 |
| M21  | 0.56 | 14.80 | 12.9 | 7.10  | 3.70 | 3.00 | 0.20 | 0.48 | 0.25  | 0.20  | 0.02  | 53.25 | 11.86 | 21.10 | 21 |
| M22  | 0.62 | 13.70 | 12.2 | 5.30  | 2.80 | 1.90 | 0.20 | 0.39 | 0.23  | 0.14  | 0.01  | 53.25 | 11.86 | 21.10 | 21 |
| M23  | 0.81 | 12.90 | 11.4 | 6.40  | 3.80 | 2.50 | 0.10 | 0.50 | 0.29  | 0.19  | 0.01  | 39.71 | 7.74  | 13.33 | 14 |
| M24  | 0.74 | 10.50 | 9.5  | 5.00  | 3.10 | 1.80 | 0.10 | 0.47 | 0.29  | 0.17  | 0.01  | 67.38 | 8.77  | 34.89 | 13 |
| M25  | 0.65 | 15.40 | 13.5 | 7.40  | 4.20 | 2.70 | 0.40 | 0.48 | 0.27  | 0.18  | 0.02  | 70.45 | 7.60  | 27.19 | 8  |
| M26  | 0.69 | 15.10 | 13.2 | 6.70  | 4.20 | 2.20 | 0.20 | 0.44 | 0.27  | 0.14  | 0.01  | 46.19 | 8.81  | 15.41 | 14 |
| M27  | 0.47 | 10.90 | 9.9  | 4.00  | 2.30 | 1.50 | 0.10 | 0.36 | 0.21  | 0.14  | 0.01  | 66.13 | 11.36 | 23.83 | 14 |
| M28  | 0.76 | 12.00 | 10.7 | 6.30  | 4.20 | 2.10 |      | 0.55 | 0.36  | 0.18  |       | 64.59 | 7.18  | 25.02 | 14 |
| M29  | 0.55 | 12.00 | 10.7 | 4.00  | 2.20 | 1.40 | 0.30 | 0.33 | 0.19  | 0.12  | 0.03  | 50.26 | 12.48 | 20.61 | 14 |
| M30  | 0.22 | 14.60 | 12.6 | 3.80  | 2.10 | 1.30 | 0.50 | 0.26 | 0.14  | 0.09  | 0.03  | 75.02 | 3.49  | 22.13 | 1  |
| M31  | 0.94 | 12.20 | 10.9 | 5.20  |      |      |      | 0.43 |       |       |       | 44.34 | 10.73 | 17.91 | 14 |
| M32  | 0.55 | 12.00 | 10.8 | 5.30  | 3.80 | 1.30 | 0.10 | 0.44 | 0.32  | 0.11  | 0.01  | 66.67 | 10.77 | 29.42 | 14 |

| Code | FIS2 | FIS3  | FIS4 | FIS5  | FIS6 | FIS7 | FIS8 | FIS9 | FIS10 | FIS11 | FIS12 | C4    | C5    | C6    | C7 |
|------|------|-------|------|-------|------|------|------|------|-------|-------|-------|-------|-------|-------|----|
| M33  | 1.00 | 11.30 | 10.2 | 7.50  |      |      |      | 0.67 |       |       |       | 39.87 | 19.77 | 16.74 | 21 |
| T1   | 0.48 | 10.90 | 9.8  | 4.00  |      |      |      | 0.37 |       |       |       | 55.95 | 12.49 | 23.49 | 17 |
| T2   | 0.43 | 11.20 | 10.1 | 5.03  |      |      |      | 0.45 |       |       |       | 85.11 | 3.22  | 21.72 | 2  |
| T3   | 0.38 | 11.90 | 10.6 | 4.10  |      |      |      | 0.34 |       |       |       | 72.87 | 5.53  | 23.10 | 7  |
| T4   | 0.52 | 11.00 | 9.9  | 4.94  |      |      |      | 0.50 |       |       |       | 60.88 | 11.19 | 33.89 | 11 |
| T5   | 0.61 | 16.90 | 14.4 | 8.53  |      |      |      | 0.51 |       |       |       | 38.16 | 12.85 | 13.84 | 20 |
| T6   | 0.66 | 12.40 | 11.0 | 5.41  |      |      |      | 0.43 |       |       |       | 62.87 | 5.91  | 14.03 | 21 |
| T7   | 0.42 | 15.20 | 13.2 | 5.24  |      |      |      | 0.34 |       |       |       | 67.98 | 8.97  | 21.35 | 15 |
| T8   | 0.63 | 12.30 | 10.9 | 6.11  |      |      |      | 0.49 |       |       |       | 57.95 | 12.43 | 19.82 | 20 |
| T9   | 0.98 | 11.90 | 10.6 | 8.50  | 5.60 | 2.60 | 0.20 | 0.77 | 0.50  | 0.24  | 0.02  | 42.70 | 10.03 | 14.30 | 20 |
| T10  | 0.43 | 15.50 | 13.4 | 8.50  | 4.50 | 3.20 | 0.60 | 0.55 | 0.29  | 0.21  | 0.04  | 43.61 | 15.59 | 21.39 | 15 |
| T11  | 0.82 | 12.20 | 10.8 | 7.17  |      |      |      | 0.58 |       |       |       | 57.97 | 7.97  | 18.05 | 16 |
| T12  | 0.48 | 10.70 | 9.6  | 4.18  |      |      |      | 0.39 |       |       |       | 79.81 | 4.27  | 18.09 | 2  |
| T13  | 0.39 | 12.10 | 10.8 | 3.83  |      |      |      | 0.32 |       |       |       | 73.62 | 6.85  | 26.15 | 8  |
| T14  | 0.70 | 11.60 | 10.4 | 6.48  |      |      |      | 0.55 |       |       |       | 76.46 | 7.93  | 24.30 | 8  |
| T15  | 0.60 | 10.40 | 9.4  | 5.10  |      |      |      | 0.49 |       |       |       | 51.65 | 6.41  | 9.16  | 26 |
| T16  | 0.83 | 10.80 | 9.8  | 7.03  |      |      |      | 0.70 |       |       |       | 65.45 | 9.39  | 21.39 | 15 |
| T17  | 0.77 | 14.60 | 12.8 | 6.40  | 3.90 | 2.30 | 0.20 | 0.44 | 0.26  | 0.15  | 0.01  | 42.79 | 10.33 | 16.91 | 24 |
| T18  |      |       |      |       |      |      |      |      |       |       |       | 60.60 | 8.58  | 19.15 | 8  |
| T19  |      |       |      |       |      |      |      |      |       |       |       | 59.67 | 11.25 | 18.23 | 24 |
| T20  | 0.80 | 15.20 | 13.2 | 9.40  | 5.10 | 4.10 | 0.10 | 0.62 | 0.33  | 0.27  | 0.01  | 51.08 | 13.69 | 19.76 | 15 |
| T21  | 0.67 | 10.00 | 9.1  | 5.10  | 2.80 | 1.90 | 0.30 | 0.51 | 0.28  | 0.19  | 0.03  | 49.59 | 20.29 | 23.31 | 21 |
| T22  | 0.40 | 14.90 | 13.0 | 4.89  |      |      |      | 0.33 |       |       |       | 67.40 | 7.34  | 16.67 | 20 |
| T23  | 0.46 | 15.40 | 13.4 | 7.60  |      |      |      | 0.49 |       |       |       | 67.99 | 6.91  | 17.41 | 8  |
| T24  | 0.71 | 11.70 | 10.5 | 4.50  |      |      |      | 0.39 |       |       |       | 60.51 | 11.75 | 28.32 | 7  |
| T25  | 0.71 | 13.00 | 11.6 | 8.60  | 5.40 | 2.50 | 0.40 | 0.66 | 0.42  | 0.20  | 0.03  | 55.41 | 13.77 | 32.23 | 11 |
| T26  | 0.91 | 14.80 | 12.9 | 8.54  |      |      |      | 0.60 |       |       |       | 59.90 | 11.65 | 20.99 | 15 |
| T27  | 0.69 | 13.40 | 11.8 | 7.90  | 4.20 | 3.40 | 0.20 | 0.59 | 0.31  | 0.25  | 0.01  | 62.71 | 10.94 | 23.67 | 15 |
| T28  | 1.31 | 15.60 | 13.5 | 11.20 | 6.00 | 4.70 | 0.20 | 0.72 | 0.38  | 0.30  | 0.01  | 35.21 | 9.45  | 9.93  | 22 |
| T29  | 0.59 | 12.30 | 10.9 | 5.04  |      |      |      | 0.40 |       |       |       | 55.44 | 8.93  | 23.20 | 17 |
| T30  | 0.71 | 13.00 | 11.5 | 6.70  |      |      |      | 0.52 |       |       |       | 52.94 | 13.77 | 20.85 | 24 |
| T31  | 0.73 | 11.40 | 10.2 | 5.83  |      |      |      | 0.51 |       |       |       | 47.37 | 11.85 | 20.03 | 24 |
| T32  | 0.66 | 12.00 | 10.7 | 6.50  |      |      |      | 0.54 |       |       |       | 72.20 | 5.98  | 21.60 | 8  |
| T33  | 0.95 | 10.70 | 9.7  | 4.20  |      |      |      | 0.39 |       |       |       | 69.96 | 6.50  | 21.22 | 11 |
| N1   |      |       |      |       |      |      |      |      |       |       |       | 64.31 | 4.30  | 19.96 | 12 |
| N2   |      |       |      |       |      |      |      |      |       |       |       | 41.24 | 14.26 | 14.40 | 21 |
| N3   |      |       |      |       |      |      |      |      |       |       |       | 45.59 | 16.91 | 20.36 | 18 |
| N4   |      |       |      |       |      |      |      |      |       |       |       | 50.02 | 15.09 | 23.44 | 18 |
| N5   |      |       |      |       |      |      |      |      |       |       |       | 40.19 | 10.40 | 14.49 | 24 |
| N6   |      |       |      |       |      |      |      |      |       |       |       | 60.86 | 14.10 | 24.43 | 10 |
| N7   |      |       |      |       |      |      |      |      |       |       |       | 64.87 | 10.01 | 26.84 | 13 |
| N8   |      |       |      |       |      |      |      |      |       |       |       | 60.31 | 12.67 | 23.34 | 11 |
| N9   |      |       |      |       |      |      |      |      |       |       |       | 53.92 | 13.37 | 28.65 | 17 |
| N10  |      |       |      |       |      |      |      |      |       |       |       | 73.03 | 9.86  | 34.44 | 9  |
| N11  |      |       |      |       |      |      |      |      |       |       |       | 58.92 | 12.67 | 24.19 | 20 |
| N12  |      |       |      |       |      |      |      |      |       |       |       | 59.01 | 12.62 | 24.03 | 17 |
| N13  |      |       |      |       |      |      |      |      |       |       |       | 58.12 | 8.64  | 16.93 | 23 |
| N14  |      |       |      |       |      |      |      |      |       |       |       | 67.38 | 10.98 | 24.41 | 6  |
| N15  |      |       |      |       |      |      |      |      |       |       |       | 61.80 | 13.71 | 24.15 | 18 |

**Table S2.** Statistics of the principal component analyses (PCA) for the anatomical and physical wood characteristics (coded in Table 2) of the tropical species sets (as described in Tables 1 and 3). Loadings of the anatomical and physical variables to the principal component (PC) 1–3 of variation.

| Variable | 81 species |         |         | 87 species |         |         | 54 species |         |         |
|----------|------------|---------|---------|------------|---------|---------|------------|---------|---------|
|          | PC1        | PC2     | PC3     | PC1        | PC2     | PC3     | PC1        | PC2     | PC3     |
| V1       | 0.2515     | 0.2309  | 0.4690  | 0.5427     | 0.6141  | 0.0681  | -          | -       | -       |
| V4       | -0.3038    | -0.0050 | -0.4060 | -0.0818    | -0.4814 | 0.5111  | -          | -       | -       |
| V5       | -0.1231    | -0.2070 | -0.5405 | -0.3007    | -0.4093 | -0.0822 | -          | -       | -       |
| V6       | -0.4745    | 0.3481  | 0.0915  | -0.2649    | 0.5069  | 0.6807  | -          | -       | -       |
| V7       | -0.6173    | -0.2679 | -0.4981 | -0.4665    | -0.7444 | 0.2250  | -          | -       | -       |
| V1       | 0.2515     | 0.2309  | 0.4690  | 0.5427     | 0.6141  | 0.0681  | -          | -       | -       |
| R1       | 0.5057     | 0.2433  | -0.0057 | 0.6176     | 0.0928  | 0.4587  | -          | -       | -       |
| R3       | -0.2567    | -0.4913 | -0.0094 | -0.5295    | -0.1746 | -0.2768 | -          | -       | -       |
| R5       | -0.7234    | -0.3546 | 0.4290  | -0.6095    | 0.6320  | -0.0169 | -          | -       | -       |
| R7       | -0.6060    | -0.4831 | 0.4593  | -0.6135    | 0.2791  | -0.4570 | -          | -       | -       |
| R8       | -0.6626    | -0.4092 | 0.2799  | -0.8422    | 0.1954  | -0.2551 | -          | -       | -       |
| F1       | -0.0092    | -0.4795 | 0.2951  | -0.1737    | 0.1947  | 0.0662  | -          | -       | -       |
| F2       | -0.7265    | -0.2865 | 0.0060  | -0.6578    | 0.1878  | 0.5585  | -          | -       | -       |
| F4       | -0.5913    | 0.3130  | -0.4423 | -0.4596    | -0.0435 | 0.6334  | -          | -       | -       |
| C4       | -0.5512    | 0.6898  | 0.1776  | -          | -       | -       | 0.4160     | 0.6318  | 0.3112  |
| C5       | 0.1819     | -0.4806 | 0.0332  | -          | -       | -       | -0.0583    | -0.4194 | 0.3181  |
| C6       | -0.5281    | 0.2970  | 0.2259  | -          | -       | -       | 0.3687     | 0.4180  | 0.5789  |
| C7       | 0.4070     | -0.6119 | -0.0536 | -          | -       | -       | -0.3926    | -0.4750 | -0.4826 |
| FIS1     | 0.7012     | -0.3895 | 0.3006  | -          | -       | -       | -0.4748    | -0.6593 | -0.2174 |
| FIS3     | -0.0387    | -0.3688 | -0.5274 | -          | -       | -       | -          | -       | -       |
| FIS 4    | -          | -       | -       | -          | -       | -       | -0.4066    | 0.8428  | -0.0486 |
| FIS5     | 0.1614     | -0.3091 | -0.3094 | -          | -       | -       | -0.7757    | 0.5559  | 0.2020  |
| FIS6     | -          | -       | -       | -          | -       | -       | -0.7441    | 0.6105  | 0.1241  |
| FIS7     | -          | -       | -       | -          | -       | -       | -0.7862    | 0.3534  | 0.2720  |
| FIS8     | -          | -       | -       | -          | -       | -       | 0.4033     | -0.2183 | 0.6122  |
| FIS9     | -          | -       | -       | -          | -       | -       | -0.6473    | -0.5457 | 0.4163  |
| FIS10    | -          | -       | -       | -          | -       | -       | -0.6045    | -0.3683 | 0.3129  |
| FIS11    | -          | -       | -       | -          | -       | -       | -0.5972    | -0.5443 | 0.3820  |
| FIS12    | -          | -       | -       | -          | -       | -       | 0.5275     | -0.4700 | 0.5041  |

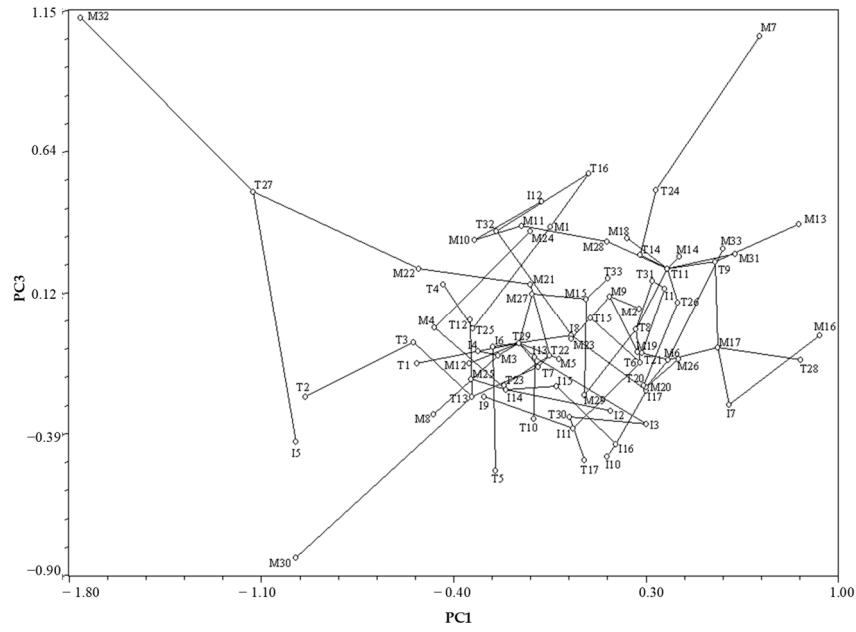

(a)

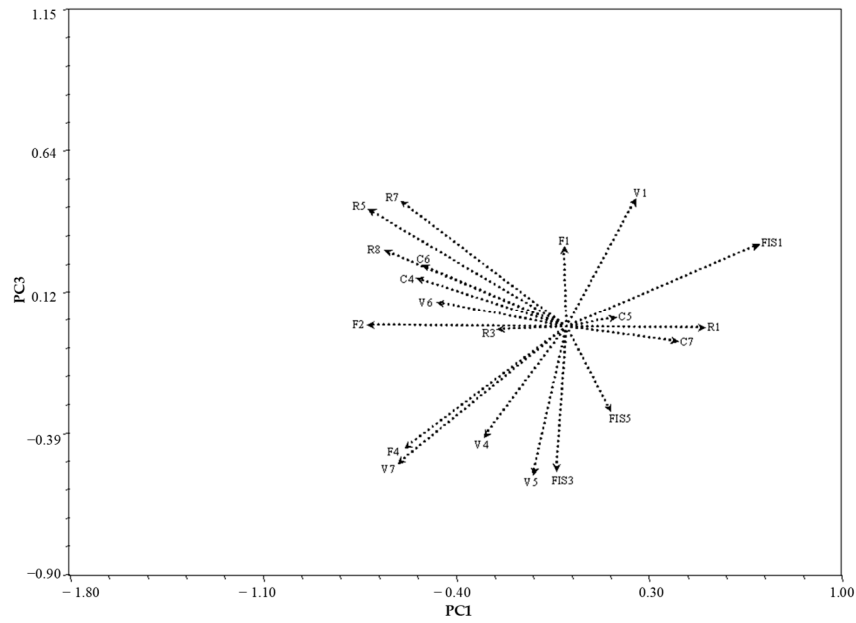

(b)

**Figure S1.** a) PC1 and PC3 projection plot of the 81 tropical species (as listed in Table 1 and 3) based on both anatomical and physical wood characteristics (coded in Table 2), overlapped by the MST method. b) The indication of the correlation degree between the variables based on the position of the vector.

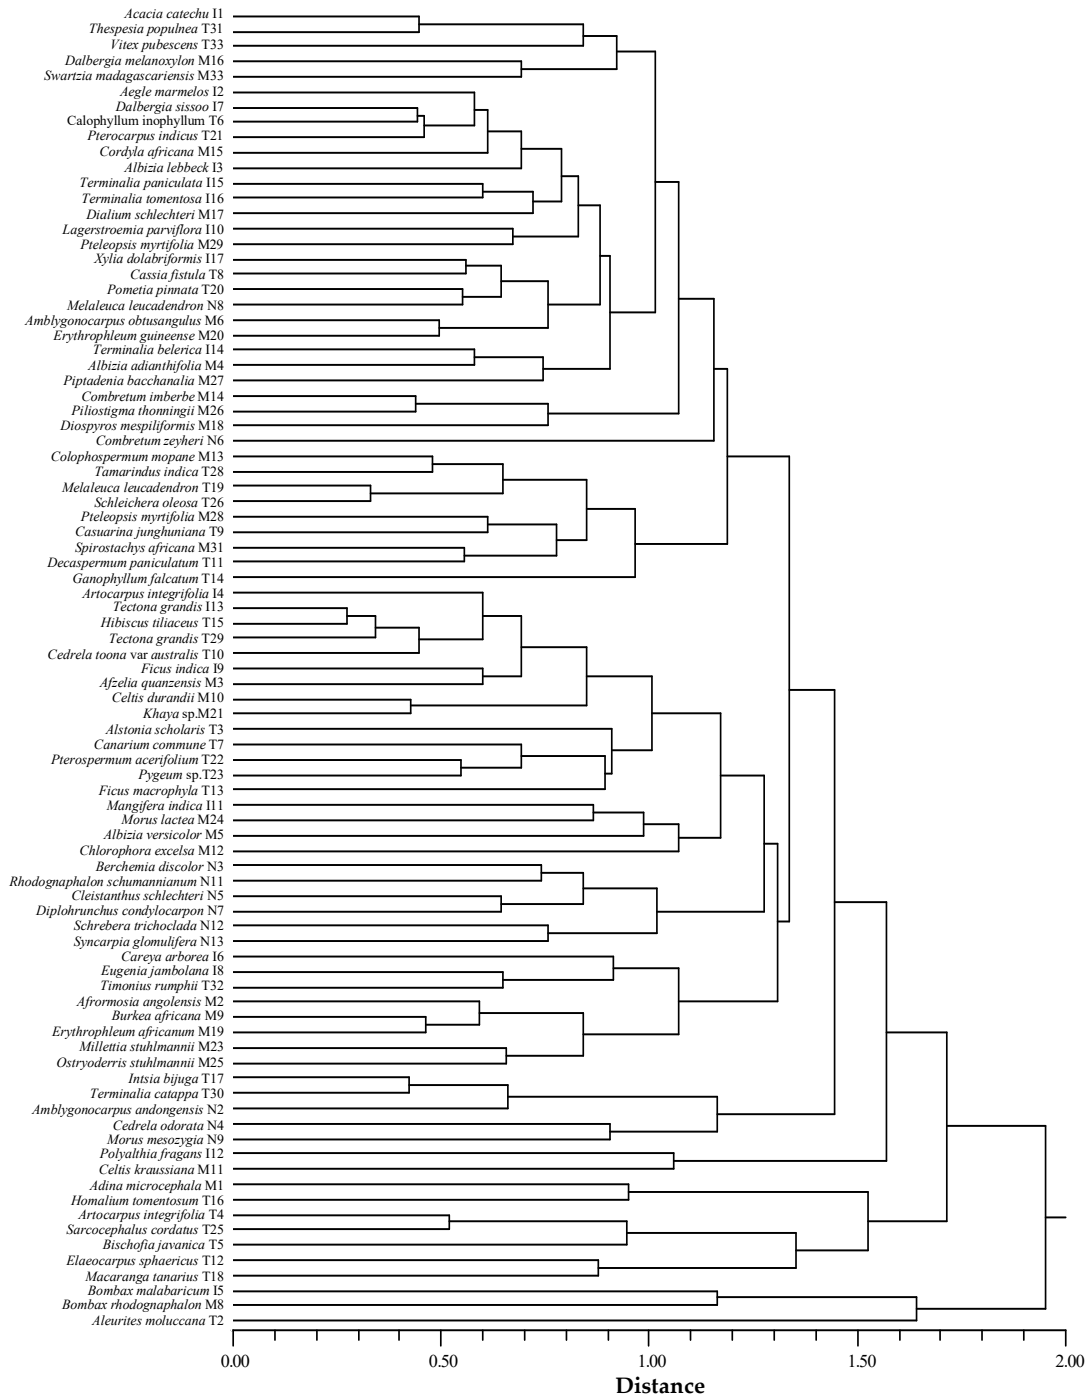

**Figure S2.** Classification of 87 tropical species (listed in Tables 1 and 3) based on 13 anatomical wood characteristics (coded in Table 2). obtained by the UPGMA clustering method ( $c = 0.695$ ).

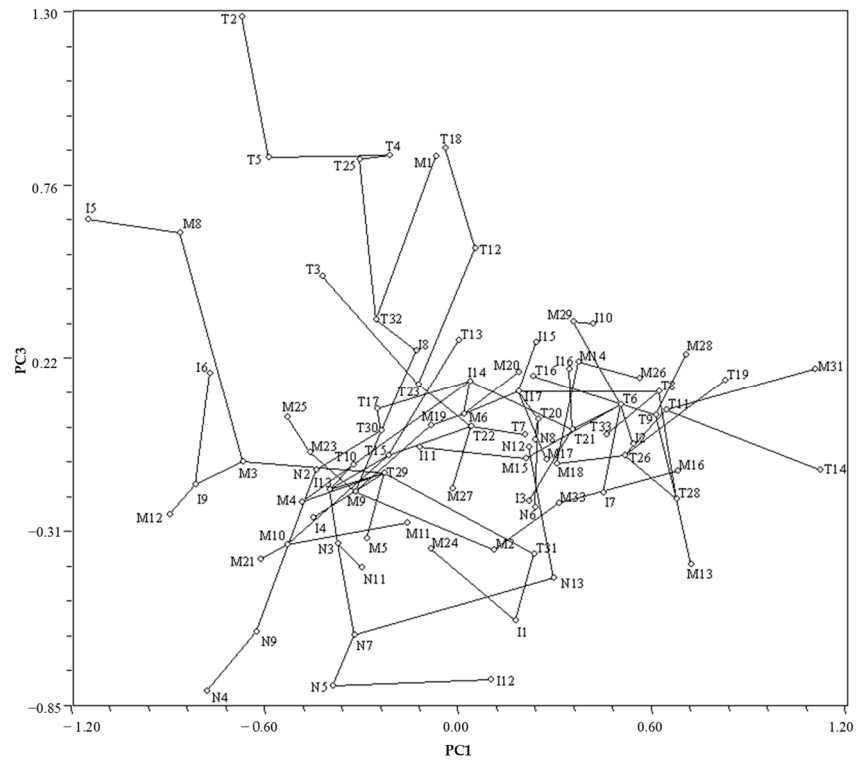

(a)

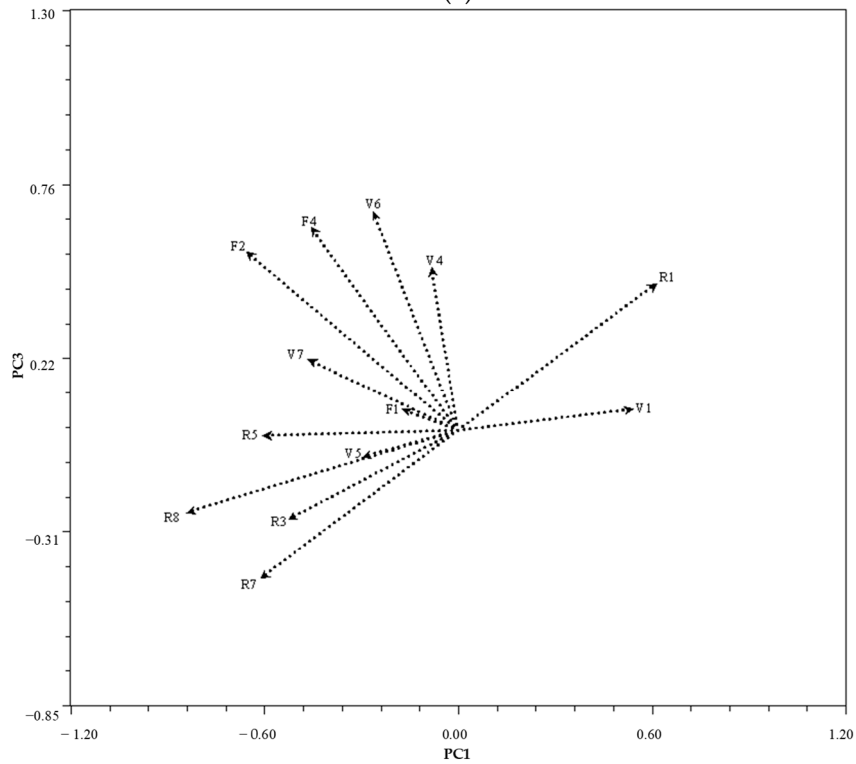

(b)

**Figure S3.** a) PC1 and PC3 projection plots of the 87 tropical species (as listed in Tables 1 and 3) based on anatomical wood characteristics (coded in Table 2). overlapped by the MST method. b) The indication of the correlation degree between the variables based on the position of the vector.







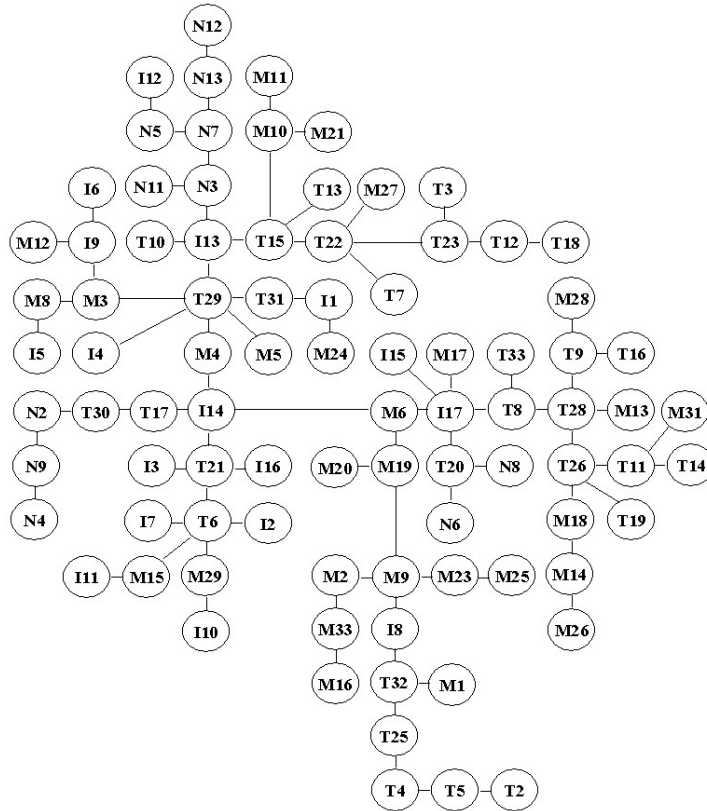

**Figure S6.** The minimum spanning tree (MST) also known as SCN (shortest connection network) showing the connections of the 87 tropical species set (distances are not at scale).

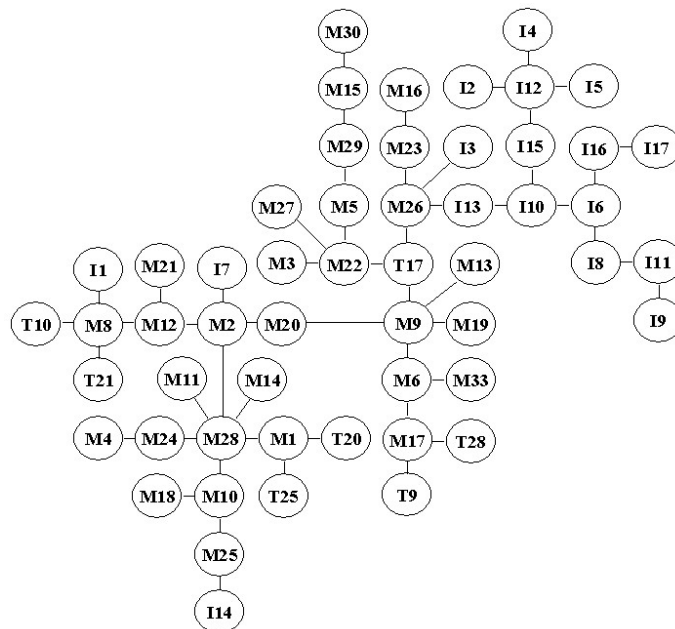

**Figure S7.** The minimum spanning tree (MST) also known as SCN (shortest connection network) showing the connections of the 54 tropical species set (distances are not at scale).
